# Supplementary material
Source: PubMed Central journal article supplement (PMC552950)

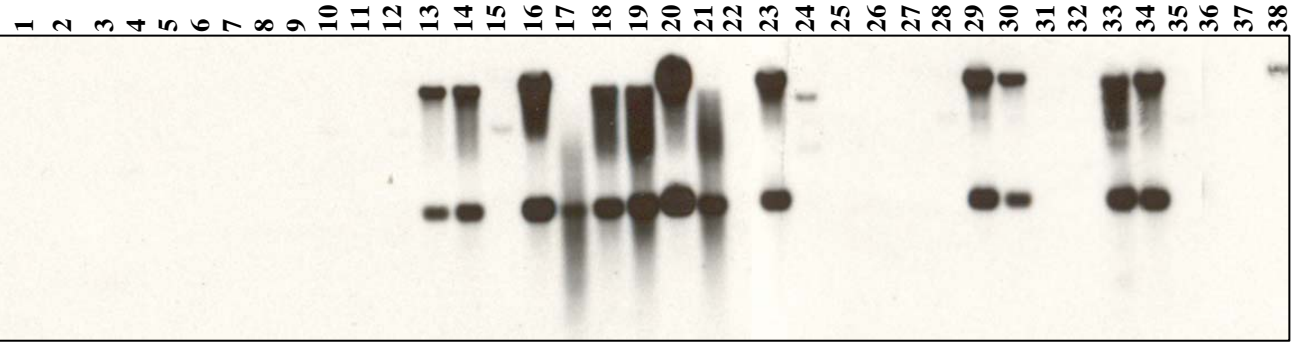

Supplement: pnas_102_9_3465__1.pdf [file pnas_102_9_3465__1.pdf]
